# Supplementary material
Source: PubMed Central journal article supplement (PMC5439416)
Supplement: DC162591SupplementaryData.pdf [file DC162591SupplementaryData.pdf]

SUPPLEMENTARY DATA

**Supplementary Table 1. Cases of SGLT2i-associated ketoacidosis identified.**

| Case #                                                               | Summary or Average (when known) | 1                                                 | 2              |                | 3                                                      |                                            |                                            | 4                  | 5                  |
|----------------------------------------------------------------------|---------------------------------|---------------------------------------------------|----------------|----------------|--------------------------------------------------------|--------------------------------------------|--------------------------------------------|--------------------|--------------------|
| Timing of episodes                                                   | 8% with >1 episode              |                                                   | first          | +2 days        | first                                                  | +4 days                                    | +32 days                                   |                    |                    |
| Age (years)                                                          | 54.0                            | 67                                                | 56             | 56             | 48                                                     | 48                                         | 48                                         | 53                 | 26                 |
| M/F                                                                  | 46% M, 54% F                    | F                                                 | F              | F              | F                                                      | F                                          | F                                          | M                  | F                  |
| T1/T2                                                                | 13% T1, 74% T2, 13% unknown     | T2                                                | T2             | T2             | T2                                                     | T2                                         | T2                                         | T2                 | T1                 |
| BMI (kg/m <sup>2</sup> )                                             | 31.5                            | 30                                                | 35             | 35             | 51                                                     | 51                                         | 51                                         | 34                 | 22                 |
| Duration (years)                                                     |                                 | ?                                                 | ?              | ?              | ?                                                      | ?                                          | ?                                          | 23                 | 14                 |
| SGLT2i (C/D/E, mg)                                                   | 82% C, 15% D, 3% E              | C, 100                                            | D, 5           | D, 5           | C, 300                                                 | C, 300                                     | C, 300                                     | E, 10              | C, 100             |
| Insulin                                                              | 59%                             | no                                                | MDI            | MDI            | no                                                     | no                                         | no                                         | no                 | CSII               |
| Metformin (mg)                                                       | 38%                             | 2000                                              | 2000           | 2000           | no                                                     | no                                         | no                                         | 500                | no                 |
| Sulfonylureas                                                        | 15%                             | no                                                | yes            | yes            | no                                                     | no                                         | no                                         | no                 | no                 |
| Incretin therapy                                                     | 38%                             | no                                                | GLP-1          | GLP-1          | GLP-1                                                  | GLP-1                                      | GLP-1                                      | no                 | GLP-1              |
| TZD                                                                  | 10%                             | no                                                | no             | no             | no                                                     | no                                         | no                                         | yes                | no                 |
| Most recent A1c                                                      | 10.0%                           | ?                                                 | 10.9%          | 10.9%          | 9.9%                                                   | 9.9%                                       | 9.9%                                       | ?                  | 6.8%               |
| A1c (mmol/mol)                                                       | 86                              | ?                                                 | 96             | 96             | 85                                                     | 85                                         | 85                                         | ?                  | 51                 |
| Initial glucose (mg/dl)                                              | 328                             | 231                                               | 536            | 389            | 167                                                    | 246                                        | 209                                        | 199                | 218                |
| pH                                                                   | 7.12                            | ?                                                 | ?              | ?              | ?                                                      | Ve 7.13                                    | Ve 6.99                                    | ?                  | Ve 7.15            |
| pCO <sub>2</sub> mm/Hg                                               | 29                              | ?                                                 | ?              | ?              | ?                                                      | Ve 21                                      | Ve 17                                      | ?                  | Ve 26              |
| Bicarbonate (mEq/L)                                                  | 14                              | 19                                                | 21             | 13             | 15                                                     | 6                                          | <5                                         | 21                 | 10                 |
| Anion Gap (mmol/L)                                                   | 20                              | 13                                                | 20             | 22             | 26                                                     | 23                                         | ?                                          | 18                 | 21                 |
| Ketones (U/P)                                                        | 97% present, 3% unknown         | U                                                 | U              | U              | U                                                      | U                                          | P                                          | U                  | U                  |
| Potential contributors noted                                         | 49% Nausea/Vomiting             | Acute colitis x2 days with fever and incontinence | N/V/D x1 day   | N/V/D x3 days  | N/V x1 day, epigastric pain, primary biliary cirrhosis | chest pain, N/V, primary biliary cirrhosis | chest pain, N/V, primary biliary cirrhosis | acute N/V (<1 day) | Acute N/V (<1 day) |
| Insulin dose missed or reduced                                       | 28%                             | NA                                                | Held glipizide | Held glipizide | NA                                                     | NA                                         | NA                                         | NA                 | no                 |
| Where treated                                                        | 91% In                          | ED, In                                            | ED             | ED             | UC                                                     | ED, In                                     | ED, In                                     | ED, In             | ED, In             |
| SGLT2 added within 1 month                                           | 28%                             | ?                                                 | no             | no             | no                                                     | no                                         | no                                         | no                 | no                 |
| DKA type (Glucose <=300 mg/dL or hyperglycemic (glucose >300 mg/dL)) | 72% with glucose <=300 mg/dL    | <=300 mg/dL                                       | hyperglycemic  | hyperglycemic  | <=300 mg/dL                                            | <=300 mg/dL                                | <=300 mg/dL                                | <=300 mg/dL        | <=300 mg/dL        |

## SUPPLEMENTARY DATA

| Case #                                                               | 6                                   | 7             | 8                                        | 9                                                               | 10                              | 11                                                | 12                                             | 13                                        | 14          |
|----------------------------------------------------------------------|-------------------------------------|---------------|------------------------------------------|-----------------------------------------------------------------|---------------------------------|---------------------------------------------------|------------------------------------------------|-------------------------------------------|-------------|
| Timing of episodes                                                   |                                     |               |                                          |                                                                 |                                 |                                                   |                                                |                                           |             |
| Age (years)                                                          | 58                                  | 44            | 44                                       | 72                                                              | 37                              | 69                                                | 53                                             | 77                                        | 29          |
| M/F                                                                  | M                                   | F             | M                                        | M                                                               | F                               | F                                                 | M                                              | F                                         | M           |
| T1/T2                                                                | T2                                  | ?             | ?                                        | T2                                                              | T2                              | T2                                                | T2                                             | T2                                        | T1          |
| BMI (kg/m <sup>2</sup> )                                             | 29                                  | 18            | 28                                       | 24                                                              | morbid obesity                  | 24                                                | 38                                             | 31                                        | 29          |
| Duration (years)                                                     | ?                                   | ?             | ?                                        | ?                                                               | ?                               | ?                                                 | ?                                              | ?                                         | ?           |
| SGLT2i (C/D/E, mg)                                                   | C, ?                                | C, ?          | D, 10                                    | D, 5                                                            | C, 150                          | C, 300                                            | C, 300                                         | C, 300                                    | C, ?        |
| Insulin                                                              | no                                  | MDI           | MDI                                      | no                                                              | PMI                             | PMI                                               | MDI                                            | no                                        | MDI         |
| Metformin (mg)                                                       | no                                  | no            | no                                       | 500                                                             | 2000                            | 2000                                              | 500                                            | 1000                                      | no          |
| Sulfonylureas                                                        | yes                                 | no            | no                                       | no                                                              | yes                             | no                                                | no                                             | yes                                       | no          |
| Incretin therapy                                                     | no                                  | no            | no                                       | DPP4                                                            | no                              | no                                                | no                                             | no                                        | no          |
| TZD                                                                  | no                                  | no            | no                                       | no                                                              | no                              | no                                                | no                                             | yes                                       | no          |
| Most recent A1c                                                      | 9.5%                                | 14.1%         | 7.6%                                     | 9.7%                                                            | ?                               | 10.5%                                             | ?                                              | ?                                         | 9.5%        |
| A1c (mmol/mol)                                                       | 80                                  | 131           | 60                                       | 83                                                              | ?                               | 91                                                | ?                                              | ?                                         | 80          |
| Initial glucose (mg/dl)                                              | 299                                 | 769           | 216                                      | 904                                                             | 162                             | 419                                               | 205                                            | 186                                       | 198         |
| pH                                                                   | Ve 7.2                              | ?             | 7.34                                     | 7.37                                                            | 7.12                            | Ve 7.29                                           | 7.23                                           | 7.17                                      | ?           |
| pCO <sub>2</sub> mm/Hg                                               | Ve 28                               | ?             | 39                                       | 42                                                              | 11                              | Ve 50                                             | 31                                             | 36                                        | ?           |
| Bicarbonate (mEq/L)                                                  | 10                                  | 14            | 17                                       | 17                                                              | 9                               | 21                                                | 11                                             | 18                                        | 13          |
| Anion Gap (mmol/L)                                                   | 29                                  | 28            | 17                                       | 21                                                              | 19                              | 15                                                | 16                                             | 15                                        | 16          |
| Ketones (U/P)                                                        | U                                   | U+P           | U+P                                      | U+P                                                             | P                               | P                                                 | U                                              | U                                         | U+P         |
| Potential contributors noted                                         | Chemotherapy initiated, N/V x3 days | N/V x4 days   | pain treated with narcotics, N/V x5 days | Non-adherence, mental status change, seizure, steroid injection | Gastric bypass surgery same day | Husband died 3 weeks earlier, hematochezia x1 day | 4 days post-gastric bypass, weakness, new Afib | N/V x2 days, ureteral stone, septic shock | N/V x1 day  |
| Insulin dose missed or reduced                                       | NA                                  | yes           | no                                       | NA                                                              | no                              | ?                                                 | yes                                            | NA                                        | yes         |
| Where treated                                                        | ED, In                              | ED, In        | ED, In                                   | ED, In                                                          | In                              | ED, In                                            | ED, In                                         | ED, In                                    | ED, In      |
| SGLT2 added within 1 month                                           | no                                  | ?             | ?                                        | yes                                                             | ?                               | ?                                                 | no                                             | ?                                         | ?           |
| DKA type (Glucose <=300 mg/dL or hyperglycemic (glucose >300 mg/dL)) | <=300 mg/dL                         | hyperglycemic | <=300 mg/dL                              | hyperglycemic                                                   | <=300 mg/dL                     | hyperglycemic                                     | <=300 mg/dL                                    | <=300 mg/dL                               | <=300 mg/dL |

## SUPPLEMENTARY DATA

| Case #                                                               | 15          | 16            | 17            | 18                               | 19               |                                 | 20            | 21          | 22                         | 23                                                                    |
|----------------------------------------------------------------------|-------------|---------------|---------------|----------------------------------|------------------|---------------------------------|---------------|-------------|----------------------------|-----------------------------------------------------------------------|
| Timing of episodes                                                   |             |               |               |                                  | first            | +2 weeks                        |               |             |                            |                                                                       |
| Age (years)                                                          | 45          | 28            | 49            | 68                               | 60               | 60                              | 48            | 55          | 66                         | 49                                                                    |
| M/F                                                                  | F           | F             | F             | M                                | M                | M                               | F             | M           | F                          | M                                                                     |
| T1/T2                                                                | T2          | T1            | T2            | T2                               | T2               | T2                              | T2            | T2          | T1                         | T2                                                                    |
| BMI (kg/m <sup>2</sup> )                                             | 29          | 29            | 39            | 27                               | unknown          | unknown                         | 30            | 20.66       | 16                         | 36.12                                                                 |
| Duration (years)                                                     | 3           | ?             | ?             | ?                                | 26               | 26                              | 4             | 12          | 25                         | 10                                                                    |
| SGLT2i (C/D/E, mg)                                                   | C, 300      | C, 300        | C, 300        | C, 100                           | C, 300           | C, 300                          | C, ?          | C, 100      | C, ?                       | C, 100                                                                |
| Insulin                                                              | no          | MDI           | no            | MDI                              | BI               | BI                              | no            | MDI         | MDI                        | MDI                                                                   |
| Metformin (mg)                                                       | ?           | no            | 2000          | 2000                             | 2000             | 2000                            | 2000          | no          | no                         | ?                                                                     |
| Sulfonylureas                                                        | no          | no            | no            | no                               | no               | no                              | no            | no          | no                         | no                                                                    |
| Incretin therapy                                                     | DPP4        | no            | GLP-1         | no                               | GLP-1            | GLP-1                           | no            | no          | no                         | no                                                                    |
| TZD                                                                  | no          | no            | no            | no                               | no               | no                              | no            | no          | no                         | no                                                                    |
| Most recent A1c                                                      | ?           | 9.1%          | 9.3%          | ?                                | ?                | ?                               | 15.1%         | 11.0%       | ?                          | 8.6%                                                                  |
| A1c (mmol/mol)                                                       | ?           | 76            | 78            | ?                                | ?                | ?                               | 142           | 97          | ?                          | 70                                                                    |
| Initial glucose (mg/dl)                                              | 292         | 289           | 312           | 249                              | 182              | 168                             | 630           | 282         | 337                        | 346                                                                   |
| pH                                                                   | Ve 7.01     | Ve 6.95       | ?             | ?                                | 7.25             | 7.04                            | 6.7           | 7.13        | 7.16                       | 7.5                                                                   |
| pCO <sub>2</sub> mm/Hg                                               | Ve 23       | Ve 19         | ?             | ?                                | 29               | 24                              | 24.7          | 37          | 26                         | 21.9                                                                  |
| Bicarbonate (mEq/L)                                                  | 6           | <5            | ?             | 15                               | 15               | 8                               | 3.3           | 15          | 20                         | 15                                                                    |
| Anion Gap (mmol/L)                                                   | 29          | ?             | 17            | 21                               | 16               | 18                              | 24            | 20          | 21                         | 18                                                                    |
| Ketones (U/P)                                                        | P           | P             | U             | U                                | U                | U+P                             | U+P           | U+P         | U                          | U+P                                                                   |
| Potential contributors noted                                         | N/V x1 day  | N/V/D x4 days | acute stroke  | N/V x1 day, family also affected | Poor oral intake | Starvation, clonazepam overdose | No            | No          | Hip surgery within 1 month | Chronic pancreatitis, recent but not current alcohol binge, cocaine + |
| Insulin dose missed or reduced                                       | NA          | no            | NA            | no                               | no               | yes                             | NA            | yes         | yes                        | yes                                                                   |
| Where treated                                                        | ED, In      | ED, In        | ED, In        | ED, In                           | ED               | ED, In                          | ED, In        | ED, In      | ED, In                     | ED, In                                                                |
| SGLT2 added within 1 month                                           | yes         | ?             | no            | ?                                | ?                | ?                               | ?             | yes         | yes                        | ?                                                                     |
| DKA type (Glucose <=300 mg/dL or hyperglycemic (glucose >300 mg/dL)) | <=300 mg/dL | <=300 mg/dL   | hyperglycemic | <=300 mg/dL                      | <=300 mg/dL      | <=300 mg/dL                     | hyperglycemia | <=300 mg/dL | Hyperglycemic              | hyperglycemic                                                         |

## SUPPLEMENTARY DATA

| Case #                                                               | 24            | 25                             | 26            | 27                                           | 28                       | 29          | 30                        | 31                                                        | 32                                          | 33                                     |
|----------------------------------------------------------------------|---------------|--------------------------------|---------------|----------------------------------------------|--------------------------|-------------|---------------------------|-----------------------------------------------------------|---------------------------------------------|----------------------------------------|
| Timing of episodes                                                   |               |                                |               |                                              |                          |             |                           |                                                           |                                             |                                        |
| Age (years)                                                          | 62            | 43                             | 59            | 48                                           | 80                       | 45          | 62                        | 70                                                        | 58                                          | 33                                     |
| M/F                                                                  | M             | M                              | M             | M                                            | F                        | F           | F                         | M                                                         | M                                           | F                                      |
| T1/T2                                                                | T2            | T2                             | T2            | T2                                           | T2                       | T2          | ?                         | T2                                                        | ?                                           | T1                                     |
| BMI (kg/m <sup>2</sup> )                                             | 33.69         | 34.72                          | 22.12         | 33.27                                        | 20.55                    | 36.88       | 29.1                      | 24.6                                                      | 32.2                                        | 26.2                                   |
| Duration (years)                                                     | ?             | 8                              | 12            | 16                                           | ?                        | 10          | ?                         | ?                                                         | ?                                           | ?                                      |
| SGLT2i (C/D/E, mg)                                                   | C, 300        | C, ?                           | C, ?          | C, 300                                       | C, 100                   | D, 5        | C, 600                    | C, 300                                                    | C, 300                                      | D, 10                                  |
| Insulin                                                              | BI            | no                             | no            | BI                                           | no                       | MDI         | MDI                       | no                                                        | MDI                                         | BI                                     |
| Metformin (mg)                                                       | 500           | ?                              | no            | 2000                                         | 1000                     | ?           | ?                         | ?                                                         | ?                                           | ?                                      |
| Sulfonylureas                                                        | no            | no                             | no            | no                                           | no                       | no          | no                        | no                                                        | no                                          | no                                     |
| Incretin therapy                                                     | no            | no                             | no            | GLP-1                                        | DPP4                     | DPP4        | no                        | DPP4                                                      | DPP4                                        | no                                     |
| TZD                                                                  | no            | no                             | no            | no                                           | yes                      | no          | no                        | no                                                        | yes                                         | no                                     |
| Most recent A1c                                                      | 14.2%         | 12.5%                          | 10.2%         | 6.9%                                         | ?                        | 9.9%        | 8.4%                      | ?                                                         | 11.9%                                       | 11.6%                                  |
| A1c (mmol/mol)                                                       | 132           | 113                            | 88            | 52                                           | ?                        | 85          | 68                        | ?                                                         | 107                                         | 103                                    |
| Initial glucose (mg/dl)                                              | 453           | 172                            | 800           | 125                                          | 318                      | 131         | 413                       | 250                                                       | 524                                         | 596                                    |
| pH                                                                   | 7.36          | 7.32                           | 7.24          | 7.3                                          | ?                        | ?           | 7.155                     | 7.157                                                     | 6.9                                         | 7.02                                   |
| pCO <sub>2</sub> mm/Hg                                               | 28            | 29                             | 39.4          | 40                                           | ?                        | ?           | 28.3                      | 45                                                        | 24.4                                        | 11                                     |
| Bicarbonate (mEq/L)                                                  | 18            | 15                             | 17            | 21                                           | 12                       | 16          | 8                         | 12                                                        | 29                                          | 3                                      |
| Anion Gap (mmol/L)                                                   | 22            | 18                             | 23            | 15                                           | 16                       | 16          | 28                        | 20                                                        | 14                                          | 21                                     |
| Ketones (U/P)                                                        | U+P           | U+P                            | U+P           | U+P                                          | U+P                      | U+P         | U+P                       | U                                                         | U+P                                         | U                                      |
| Potential contributors noted                                         | no            | Acute weight loss of 15 pounds | no            | Canagliflozin dose increased within the week | Acalculous cholecystitis | no          | Colonoscopy prep with N/V | Possible digoxin toxicity, acute renal failure, intubated | alcohol abuse, recurrent acute pancreatitis | N/V/D, abdominal pain, dyspnea x3 days |
| Insulin dose missed or reduced                                       | yes           | NA                             | NA            | yes                                          | NA                       | no          | ?                         | NA                                                        | ?                                           | yes                                    |
| Where treated                                                        | ED, In        | ED, In                         | ED, In        | ED, In                                       | ED, In                   | ED, In      | In                        | In                                                        | In                                          | In                                     |
| SGLT2 added within 1 month                                           | yes           | yes                            | ?             | no                                           | yes                      | yes         | yes                       | yes                                                       | no                                          | ?                                      |
| DKA type (Glucose <=300 mg/dL or hyperglycemic (glucose >300 mg/dL)) | hyperglycemia | <=300 mg/dL                    | hyperglycemic | <=300 mg/dL                                  | hyperglycemic            | <=300 mg/dL | hyperglycemic             | <=300 mg/dL                                               | hyperglycemic                               | hyperglycemic                          |

SUPPLEMENTARY DATA

| Case #                                                               | 34                                                                | 35                              | 36                                         | 37            | 38                                                           | 39             |
|----------------------------------------------------------------------|-------------------------------------------------------------------|---------------------------------|--------------------------------------------|---------------|--------------------------------------------------------------|----------------|
| Timing of episodes                                                   |                                                                   |                                 |                                            |               |                                                              |                |
| Age (years)                                                          | 53                                                                | 63                              | 35                                         | 56            | 60                                                           | 69             |
| M/F                                                                  | F                                                                 | M                               | F                                          | F             | F                                                            | M              |
| T1/T2                                                                | T2                                                                | T2                              | T2                                         | T2            | ?                                                            | T2             |
| BMI (kg/m <sup>2</sup> )                                             | 31                                                                | 38.4                            | 43.5                                       | 37.5          | 26.9                                                         | 30.9           |
| Duration (years)                                                     | 16                                                                | ?                               | ?                                          | 5             | 12                                                           | 5              |
| SGLT2i (C/D/E, mg)                                                   | C, 300                                                            | C, 300                          | D, 10                                      | C, 300        | C, 300                                                       | C, 300         |
| Insulin                                                              | MDI                                                               | PMI                             | no                                         | no            | MDI                                                          | no             |
| Metformin (mg)                                                       | ?                                                                 | no                              | no                                         | ?             | ?                                                            | ?              |
| Sulfonylureas                                                        | no                                                                | yes                             | no                                         | yes           | no                                                           | no             |
| Incretin therapy                                                     | no                                                                | no                              | GLP-1                                      | DPP4          | no                                                           | DPP4           |
| TZD                                                                  | no                                                                | no                              | no                                         | no            | no                                                           | no             |
| Most recent A1c                                                      | 8.5%                                                              | 10.9%                           | ?                                          | 7.9%          | 7.7%                                                         | 6.5%           |
| A1c (mmol/mol)                                                       | 69                                                                | 96                              | ?                                          | 63            | 61                                                           | 48             |
| Initial glucose (mg/dl)                                              | 400's                                                             | 380                             | 215                                        | 328           | 244                                                          | 167            |
| pH                                                                   | Ve 7.172                                                          | 7.27                            | Ve 7.265                                   | ?             | 7.348                                                        | ?              |
| pCO <sub>2</sub> mm/Hg                                               | Ve 19.8                                                           | 26.1                            | Ve 30.7                                    | ?             | 20.4                                                         | ?              |
| Bicarbonate (mEq/L)                                                  | 8                                                                 | 13                              | 14                                         | 24            | 8                                                            | 20             |
| Anion Gap (mmol/L)                                                   | 34                                                                | 16                              | 18                                         | 13            | 24                                                           | 16             |
| Ketones (U/P)                                                        | P                                                                 | P                               | U+P                                        | U             | U                                                            | ?              |
| Potential contributors noted                                         | N/V/D, abdominal pain x 2 days, severe dehydration, gastroparesis | Fournier gangrene, septic shock | Marijuana use, N/V/D x1 day, gastroparesis | N/V/D         | N/V, malaise x1 day, recent stressors, decrease urine output | N/V/D x 3 days |
| Insulin dose missed or reduced                                       | no                                                                | ?                               | NA                                         | NA            | yes                                                          | NA             |
| Where treated                                                        | In                                                                | In                              | In                                         | In            | In                                                           | In             |
| SGLT2 added within 1 month                                           | no                                                                | ?                               | ?                                          | ?             | yes                                                          | no             |
| DKA type (Glucose <=300 mg/dL or hyperglycemic (glucose >300 mg/dL)) | hyperglycemic                                                     | hyperglycemic                   | <=300 mg/dL                                | hyperglycemic | <=300 mg/dL                                                  | <=300 mg/dL    |
